# Supplementary material for: The Medicinal Halophyte Frankenia laevis L. (Sea Heath) Has In Vitro Antioxidant Activity, α-Glucosidase Inhibition, and Cytotoxicity towards Hepatocarcinoma Cells
Source: MDPI journal article supplement (doi:10.3390/plants11101353), 2022-05-19
Supplement: s1 [file s1]

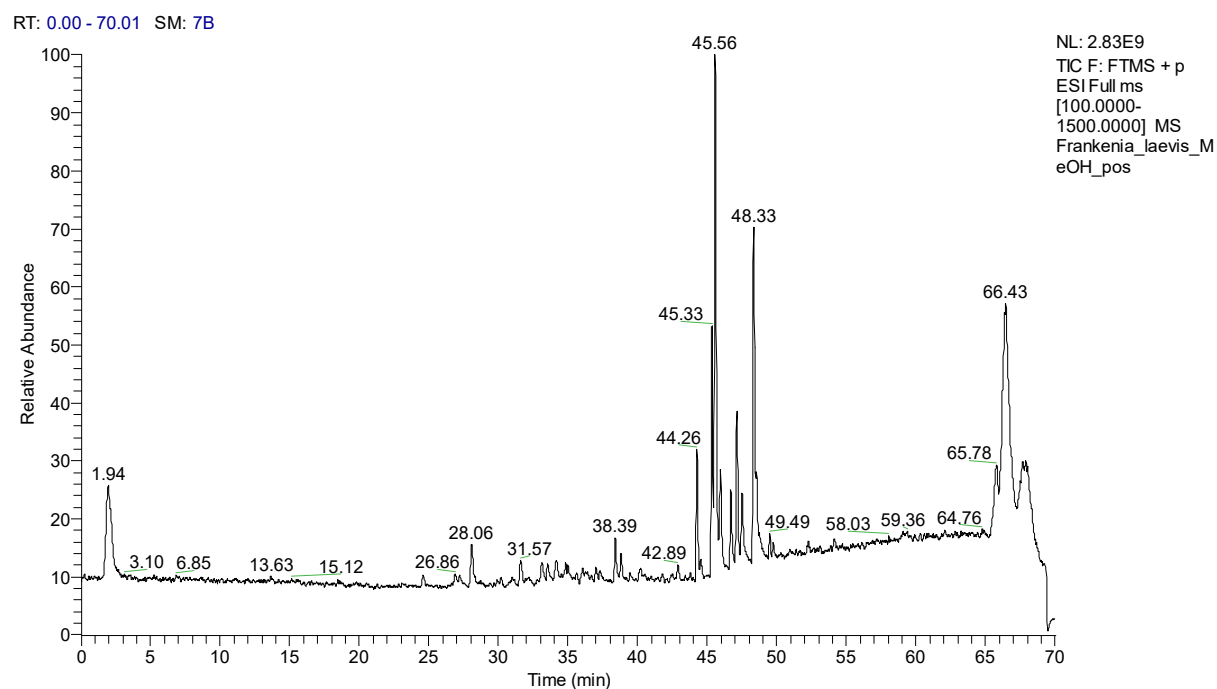

**Figure S1.** Total ion chromatogram (positive mode) of *F. laevis* methanol extract.

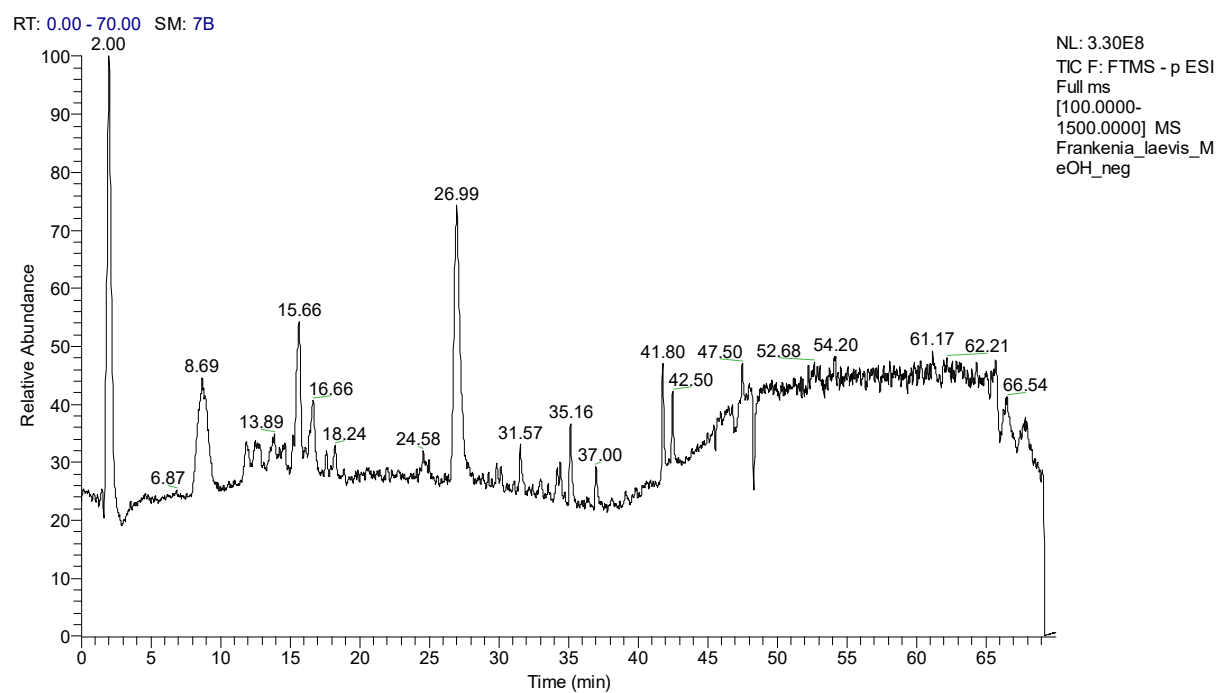

**Figure S2.** Total ion chromatogram (negative mode) of *F. laevis* methanol extract.

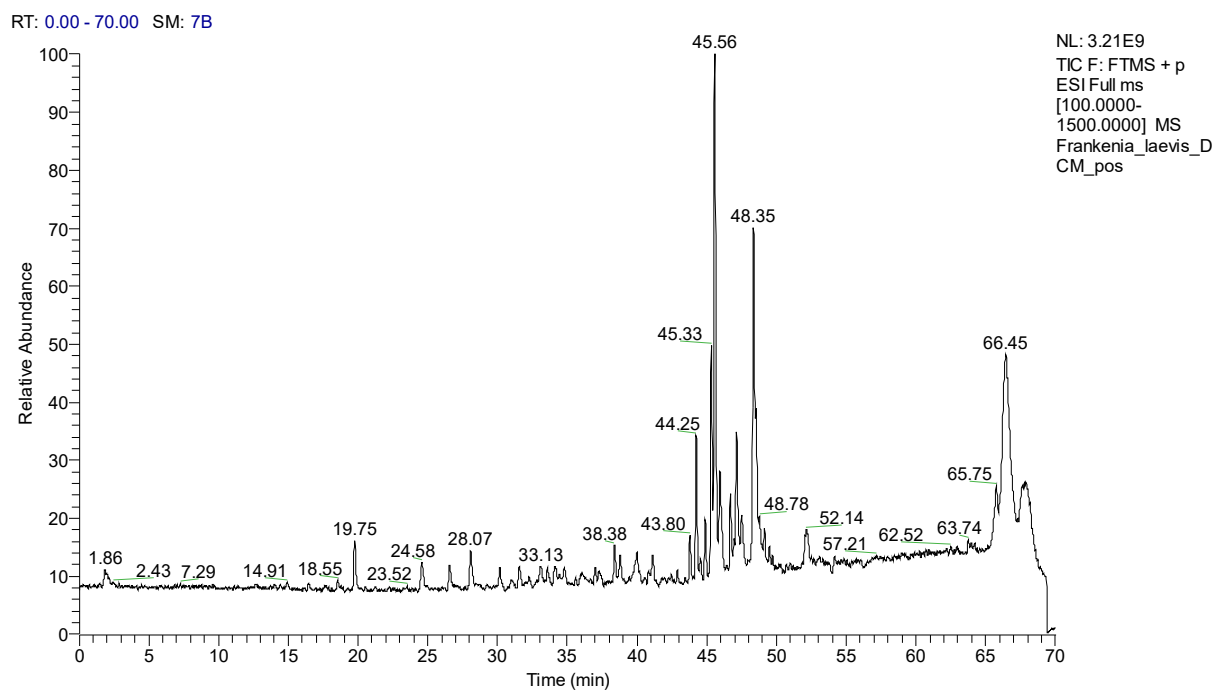

**Figure S3.** Total ion chromatogram (positive mode) of *F. laevis* dichloromethane extract.

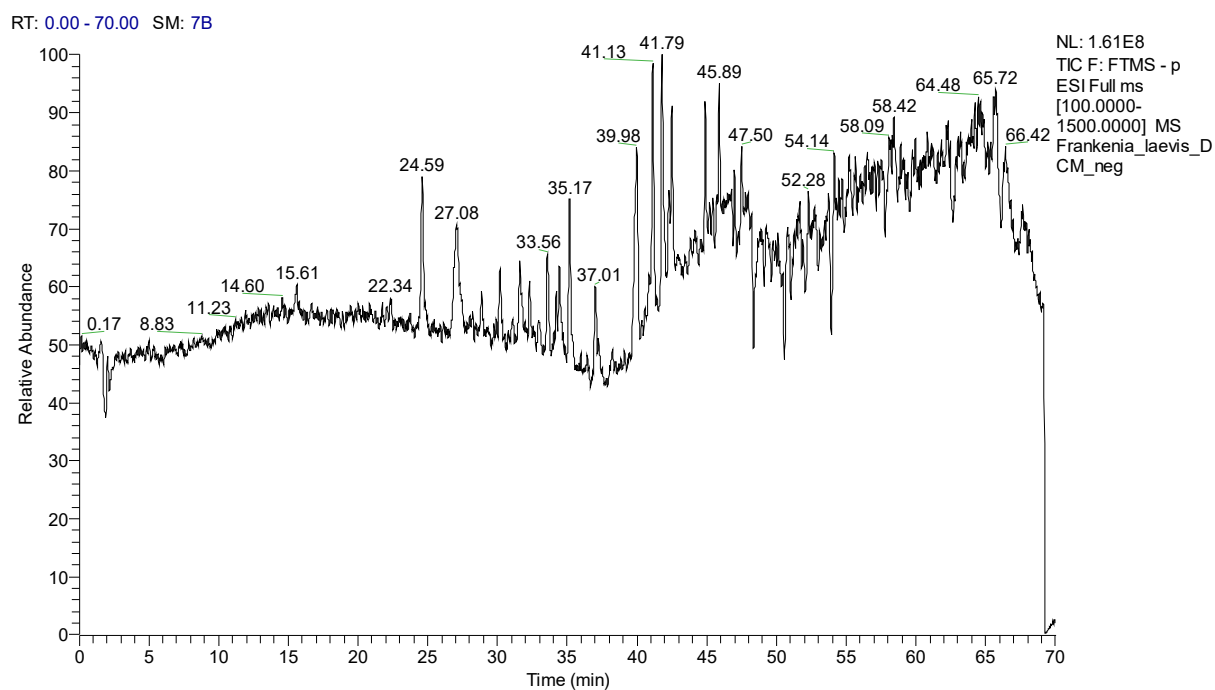

**Figure S4.** Total ion chromatogram (negative mode) of *F. laevis* dichloromethane extract.
